# Supplementary material for: Spatial Statistics and Influencing Factors of the COVID-19 Epidemic at Both Prefecture and County Levels in Hubei Province, China
Source: PubMed Central journal article supplement (PMC7312640; doi:10.3390/ijerph17113903), 2020-05-31
Supplement: ijerph-17-03903-s001.pdf [file ijerph-17-03903-s001.pdf]

1 **Table S1.** Summary of the Spearman’s rank correlation results for the new confirmed COVID-19 cases with the terrain,  
 2 land area, population and economic indicators, and Baidu migration index at the prefecture level in Hubei.

| Indicator | MINE     | MAXE     | MNE     | RAE      | LA     | PD      | RGP     | RSP     | TRS     | GDP     | BDMI    |
|-----------|----------|----------|---------|----------|--------|---------|---------|---------|---------|---------|---------|
| ncc0124   | -0.173   | 0.021    | -0.044  | 0.031    | 0.263  | 0.040   | 0.480   | 0.440   | 0.235   | 0.242   | 0.190   |
| ncc0125   | -0.565*  | 0.119    | 0.106   | 0.119    | 0.407  | 0.148   | 0.713** | 0.723** | 0.706** | 0.708** | 0.485   |
| ncc0126   | -0.330   | 0.087    | 0.038   | 0.070    | 0.355  | 0.206   | 0.672** | 0.712** | 0.647** | 0.720** | 0.487   |
| ncc0127   | -0.424   | 0.016    | -0.055  | -0.011   | 0.242  | 0.380   | 0.688** | 0.717** | 0.708** | 0.761** | 0.767** |
| ncc0128   | -0.434   | 0.059    | 0.032   | 0.044    | 0.289  | 0.348   | 0.733** | 0.750** | 0.733** | 0.752** | 0.643** |
| ncc0129   | -0.526*  | 0.013    | -0.058  | 0.007    | 0.329  | 0.312   | 0.748** | 0.795** | 0.831** | 0.874** | 0.692** |
| ncc0130   | -0.439   | -0.091   | -0.112  | -0.128   | 0.142  | 0.454   | 0.653** | 0.680** | 0.723** | 0.774** | 0.647** |
| ncc0131   | -0.553*  | 0.034    | 0.016   | 0.007    | 0.311  | 0.305   | 0.727** | 0.757** | 0.796** | 0.835** | 0.624*  |
| ncc0201   | -0.411   | -0.028   | -0.075  | -0.056   | 0.232  | 0.342   | 0.671** | 0.717** | 0.733** | 0.801** | 0.581*  |
| ncc0202   | -0.528*  | -0.022   | -0.067  | -0.044   | 0.272  | 0.380   | 0.780** | 0.791** | 0.784** | 0.791** | 0.722** |
| ncc0203   | -0.466   | 0.042    | 0.029   | 0.012    | 0.311  | 0.272   | 0.728** | 0.750** | 0.777** | 0.824** | 0.607*  |
| ncc0204   | -0.539*  | -0.120   | -0.159  | -0.142   | 0.130  | 0.522*  | 0.681** | 0.696** | 0.745** | 0.757** | 0.754** |
| ncc0205   | -0.541*  | -0.155   | -0.183  | -0.179   | 0.159  | 0.396   | 0.634** | 0.673** | 0.700** | 0.771** | 0.545*  |
| ncc0206   | -0.591*  | -0.136   | -0.164  | -0.158   | 0.146  | 0.487*  | 0.687** | 0.703** | 0.732** | 0.775** | 0.727** |
| ncc0207   | -0.468   | -0.272   | -0.333  | -0.294   | -0.039 | 0.637** | 0.556*  | 0.588*  | 0.620** | 0.654** | 0.686** |
| ncc0208   | -0.498*  | -0.076   | -0.132  | -0.096   | 0.184  | 0.485*  | 0.681** | 0.738** | 0.809** | 0.838** | 0.671** |
| ncc0209   | -0.468   | -0.253   | -0.294  | -0.282   | -0.027 | 0.587*  | 0.538*  | 0.531*  | 0.544*  | 0.542*  | 0.622*  |
| ncc0210   | -0.323   | -0.250   | -0.286  | -0.296   | -0.041 | 0.603*  | 0.508*  | 0.537*  | 0.523*  | 0.530*  | 0.442   |
| ncc0211   | -0.527*  | -0.319   | -0.359  | -0.330   | -0.097 | 0.627** | 0.443   | 0.472   | 0.477   | 0.522*  | 0.514*  |
| ncc0212   | -0.616** | -0.429   | -0.454  | -0.401   | -0.125 | 0.607** | 0.401   | 0.385   | 0.376   | 0.412   | 0.416   |
| ncc0213   | -0.392   | -0.080   | -0.126  | -0.115   | 0.048  | 0.320   | 0.380   | 0.389   | 0.370   | 0.374   | 0.368   |
| ncc0214   | -0.632** | -0.274   | -0.276  | -0.288   | -0.108 | 0.588*  | 0.400   | 0.375   | 0.472   | 0.514*  | 0.698** |
| ncc0215   | -0.218   | -0.612** | -0.578* | -0.653** | -0.442 | 0.692** | 0.097   | 0.091   | 0.112   | 0.213   | 0.109   |
| ncc0216   | 0.015    | -0.561*  | -0.552* | -0.623** | -0.383 | 0.631** | 0.117   | 0.114   | 0.031   | 0.077   | -0.093  |
| ncc0217   | 0.010    | -0.469   | -0.463  | -0.514*  | -0.275 | 0.568*  | 0.150   | 0.156   | 0.212   | 0.193   | -0.002  |
| ncc0218   | -0.050   | -0.139   | -0.221  | -0.189   | 0.048  | 0.292   | 0.446   | 0.490*  | 0.489*  | 0.514*  | 0.329   |
| nMean     | -0.566*  | -0.150   | -0.186  | -0.174   | 0.118  | 0.512*  | 0.667** | 0.684** | 0.713** | 0.765** | 0.761** |

| N5     | NES       | NS          | NM          | NW          | None       | PW        | PM        | PS        | PES     | P5     |
|--------|-----------|-------------|-------------|-------------|------------|-----------|-----------|-----------|---------|--------|
| p<0.05 | -1 ~ -0.8 | -0.8 ~ -0.6 | -0.6 ~ -0.4 | -0.4 ~ -0.2 | -0.2 ~ 0.2 | 0.2 ~ 0.4 | 0.4 ~ 0.6 | 0.6 ~ 0.8 | 0.8 ~ 1 | p<0.05 |

3 Legend for the correlation coefficient ranking of Spearman’s ρ (p<0.01): NES, negative and extremely strong; NS, negative  
 4 and strong; NM, negative and moderate; NW, negative weak; None, not significant; PW, positive and weak; PM, positive  
 5 and moderate; PS, positive and strong; PES, positive and extremely strong; N5, negative correlation (p<0.05); P5, positive  
 6 correlation (p<0.05). \*\* indicates that the correlation is significant when the confidence (double test) is 0.01; \* indicates that  
 7 the correlation is significant when the confidence (double test) is 0.05. ncc0124 indicates the number of new confirmed  
 8 cases and so on. nMean indicates to the average of the cumulative confirmed COVID-19 cases from January 24 to February  
 9 18, 2020. MINE indicates minimum elevation. MAXE indicates maximum elevation. MNE indicates mean of elevation.  
 10 RAE indicates range of elevation. LA indicates land area. PD indicates population density. RGP indicates registered  
 11 population. RSP indicates resident population. TRS indicates total retail sales of consumer goods. GDP indicates regional  
 12 gross domestic product. And BDMI indicates Baidu migration index.

**Table S2.** Summary of the Spearman's rank correlation results for the number of new confirmed COVID-19 cases with the land area, terrain, social, and economic indicators, respectively, at the county level in Hubei province from January 26 to February 18, 2020.

| Indicator  | MINE      | MAXE        | MNE         | RAE         | LA         | PD        | RGP       | RSP       | TRS     | GDP        |
|------------|-----------|-------------|-------------|-------------|------------|-----------|-----------|-----------|---------|------------|
| ncc0126    | -0.11     | -0.276**    | -0.212*     | -0.297**    | -0.278**   | 0.335**   | 0.049     | 0.076     | 0.217*  | 0.111      |
| ncc0127    | -0.355**  | -0.488**    | -0.419**    | -0.483**    | -0.237*    | 0.379**   | 0.193     | 0.236*    | 0.366** | 0.409**    |
| ncc0128    | -0.254*   | -0.350**    | -0.327**    | -0.348**    | -0.017     | 0.315**   | 0.534**   | 0.538**   | 0.440** | 0.303**    |
| ncc0129    | -0.327**  | -0.460**    | -0.480**    | -0.459**    | -0.199     | 0.423**   | 0.291**   | 0.333**   | 0.448** | 0.335**    |
| ncc0130    | -0.171    | -0.385**    | -0.382**    | -0.383**    | -0.119     | 0.451**   | 0.355**   | 0.458**   | 0.611** | 0.548**    |
| ncc0131    | -0.235*   | -0.407**    | -0.346**    | -0.415**    | -0.346**   | 0.511**   | 0.155     | 0.233*    | 0.442** | 0.361**    |
| ncc0201    | -0.296**  | -0.389**    | -0.403**    | -0.380**    | -0.169     | 0.457**   | 0.329**   | 0.401**   | 0.506** | 0.427**    |
| ncc0202    | -0.480**  | -0.511**    | -0.574**    | -0.490**    | -0.297**   | 0.626**   | 0.484**   | 0.533**   | 0.547** | 0.420**    |
| ncc0203    | -0.426**  | -0.483**    | -0.515**    | -0.466**    | -0.183     | 0.507**   | 0.493**   | 0.555**   | 0.545** | 0.503**    |
| ncc0204    | -0.434**  | -0.531**    | -0.552**    | -0.524**    | -0.332**   | 0.663**   | 0.479**   | 0.534**   | 0.547** | 0.406**    |
| ncc0205    | -0.403**  | -0.532**    | -0.531**    | -0.518**    | -0.212*    | 0.532**   | 0.458**   | 0.528**   | 0.565** | 0.530**    |
| ncc0206    | -0.397**  | -0.501**    | -0.533**    | -0.488**    | -0.131     | 0.505**   | 0.464**   | 0.545**   | 0.545** | 0.407**    |
| ncc0207    | -0.470**  | -0.571**    | -0.636**    | -0.562**    | -0.328**   | 0.648**   | 0.419**   | 0.497**   | 0.611** | 0.457**    |
| ncc0208    | -0.456**  | -0.601**    | -0.596**    | -0.598**    | -0.315**   | 0.633**   | 0.319**   | 0.422**   | 0.593** | 0.460**    |
| ncc0209    | -0.399**  | -0.399**    | -0.463**    | -0.383**    | -0.105     | 0.431**   | 0.446**   | 0.448**   | 0.356** | 0.207      |
| ncc0210    | -0.296**  | -0.492**    | -0.488**    | -0.491**    | -0.208     | 0.555**   | 0.382**   | 0.447**   | 0.548** | 0.369**    |
| ncc0211    | -0.362**  | -0.460**    | -0.494**    | -0.458**    | -0.191     | 0.501**   | 0.326**   | 0.372**   | 0.418** | 0.271*     |
| ncc0212    | -0.385**  | -0.576**    | -0.566**    | -0.580**    | -0.193     | 0.527**   | 0.351**   | 0.408**   | 0.504** | 0.344**    |
| ncc0213    | -0.231*   | -0.172      | -0.309**    | -0.155      | -0.223*    | 0.349**   | 0.250*    | 0.255*    | 0.234*  | 0.153      |
| ncc0214    | -0.321**  | -0.406**    | -0.396**    | -0.392**    | -0.255*    | 0.400**   | 0.13      | 0.176     | 0.358** | 0.284**    |
| ncc0215    | -0.179    | -0.391**    | -0.430**    | -0.395**    | -0.133     | 0.334**   | 0.252*    | 0.263*    | 0.309** | 0.236*     |
| ncc0216    | -0.133    | -0.411**    | -0.382**    | -0.421**    | -0.222*    | 0.371**   | 0.143     | 0.184     | 0.353** | 0.285**    |
| ncc0217    | -0.132    | -0.514**    | -0.457**    | -0.526**    | -0.265*    | 0.472**   | 0.190     | 0.268*    | 0.423** | 0.348**    |
| ncc0218    | -0.175    | -0.293**    | -0.266*     | -0.294**    | -0.17      | 0.307**   | 0.073     | 0.145     | 0.211*  | 0.082      |
| nMean      | -0.521**  | -0.651**    | -0.689**    | -0.637**    | -0.276**   | 0.687**   | 0.569**   | 0.644**   | 0.702** | 0.567**    |
| N5         | NES       | NS          | NM          | NW          | None       | PW        | PM        | PS        | PES     | P5         |
| $p < 0.05$ | -1 ~ -0.8 | -0.8 ~ -0.6 | -0.6 ~ -0.4 | -0.4 ~ -0.2 | -0.2 ~ 0.2 | 0.2 ~ 0.4 | 0.4 ~ 0.6 | 0.6 ~ 0.8 | 0.8 ~ 1 | $p < 0.05$ |

Legend for the correlation coefficient ranking of Spearman's  $\rho$  ( $p < 0.01$ ): NES, negative and extremely strong; NS, negative and strong; NM, negative and moderate; NW, negative weak; None, not significant; PW, positive and weak; PM, positive and moderate; PS, positive and strong; PES, positive and extremely strong; N5, negative correlation ( $p < 0.05$ ); P5, positive correlation ( $p < 0.05$ ). \*\* indicates that the correlation is significant when the confidence (double test) is 0.01; \* indicates that the correlation is significant when the confidence (double test) is 0.05. ncc0126 indicates the number of new confirmed cases and so on. nMean indicates to the average of the cumulative confirmed COVID-19 cases from January 26 to February 18, 2020. MINE indicates minimum elevation. MAXE indicates maximum elevation. MNE indicates mean of elevation. RAE indicates range of elevation. LA indicates land area. PD indicates population density. RGP indicates registered population. RSP indicates resident population. TRS indicates total retail sales of consumer goods. And GDP indicates gross domestic product.
